# Supplementary material for: Kinetics and Mechanism of BaLaCuS3 Oxidation
Source: MDPI journal article supplement (doi:10.3390/cryst13060903), 2023-06-01
Supplement: s1 [file s1]

## Supplementary Information

# Kinetics and Mechanism of BaLaCuS<sub>3</sub> Oxidation

Nikita O. Azarapin <sup>1</sup>, Nikolay A. Khritokhin <sup>1</sup>, Victor V. Atuchin <sup>2,3,4,5,\*</sup>, Alexey A. Gubin <sup>6</sup>,  
Maxim S. Molokeev <sup>7,8,9</sup>, Shaibal Mukherjee <sup>10,11,12</sup> and Oleg V. Andreev <sup>1,13</sup>

<sup>1</sup> Department of Inorganic and Physical Chemistry, Tyumen State University, Tyumen 625003, Russia

<sup>2</sup> Laboratory of Optical Materials and Structures, Institute of Semiconductor Physics, Siberian Branch of the Russian Academy of Sciences, Novosibirsk 630090, Russia

<sup>3</sup> Research and Development Department, Kemerovo State University, Kemerovo 650000, Russia

<sup>4</sup> Department of Industrial Machinery Design, Novosibirsk State Technical University, Novosibirsk 630073, Russia

<sup>5</sup> R&D Center "Advanced Electronic Technologies", Tomsk State University, Tomsk 634034, Russia

<sup>6</sup> Laboratory for Nanomaterials and Nanoelectronics, Center for Nature-Inspired Engineering, Technology Park, Tyumen State University, Tyumen 625003, Russia

<sup>7</sup> Laboratory of Crystal Physics, Kirensky Institute of Physics, Federal Research Center KSC SB RAS, Krasnoyarsk 660036, Russia

<sup>8</sup> Laboratory of Theory and Optimization of Chemical and Technological Processes, University of Tyumen, Tyumen 625003, Russia

<sup>9</sup> Institute of Engineering Physics and Radioelectronics, Siberian Federal University, Krasnoyarsk 660041, Russia

<sup>10</sup> Hybrid Nanodevice Research Group (HNRG), Department of Electrical Engineering, Indian Institute of Technology Indore, Indore 453552, India

<sup>11</sup> Centre for Advanced Electronics (CAE), Indian Institute of Technology Indore, Indore 453552, India

<sup>12</sup> School of Engineering, RMIT University, Melbourne, VIC 3001, Australia

<sup>13</sup> Institute of Solid State Chemistry, UB RAS, Yekaterinburg 620990, Russia

\* Correspondence: atuchin@isp.nsc.ru

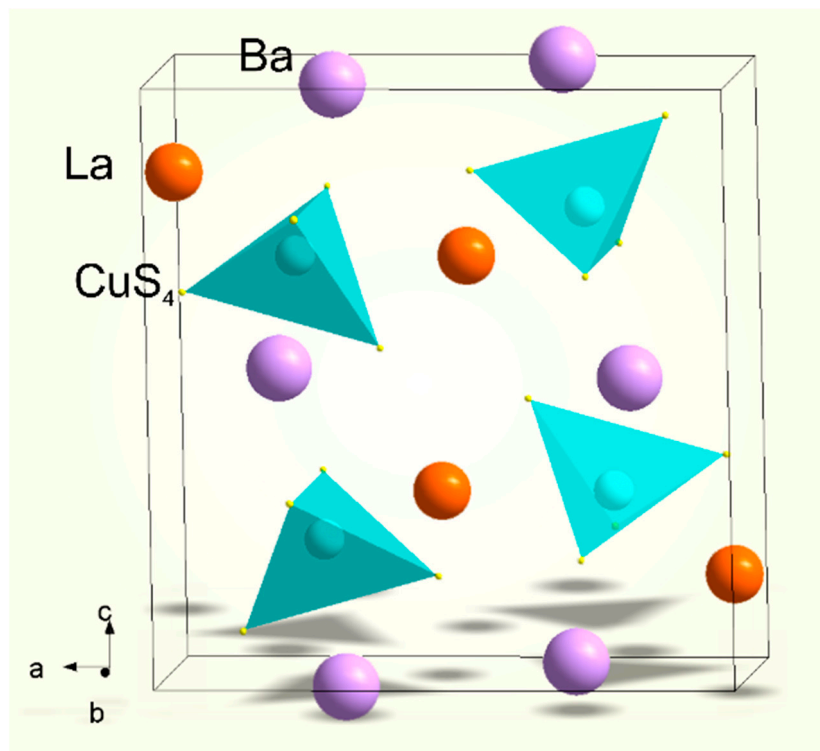

**Figure S1.** Crystal structure of  $\text{BaLaCuS}_3$

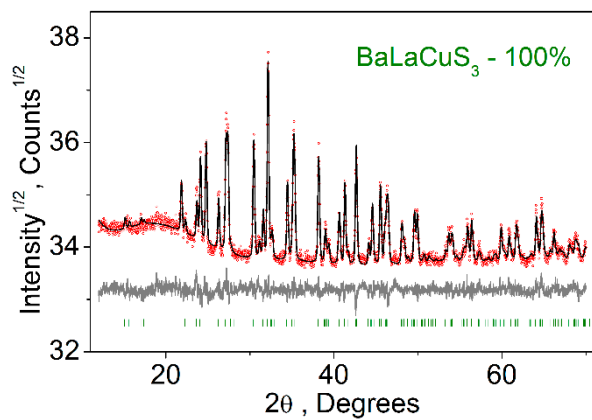

a)

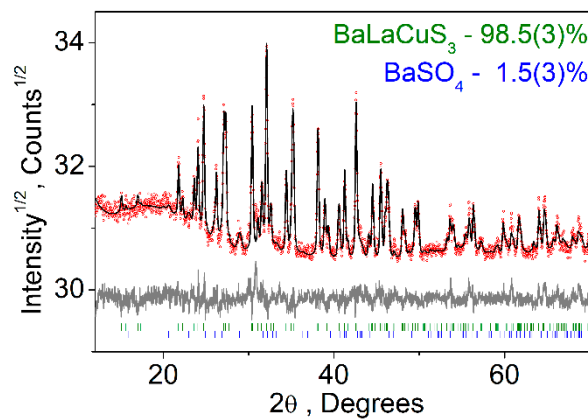

b)

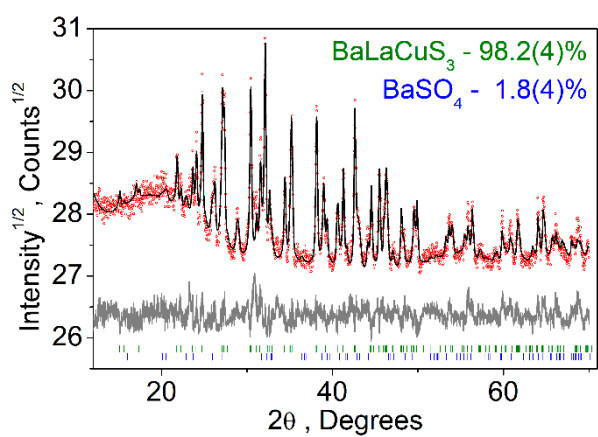

c)

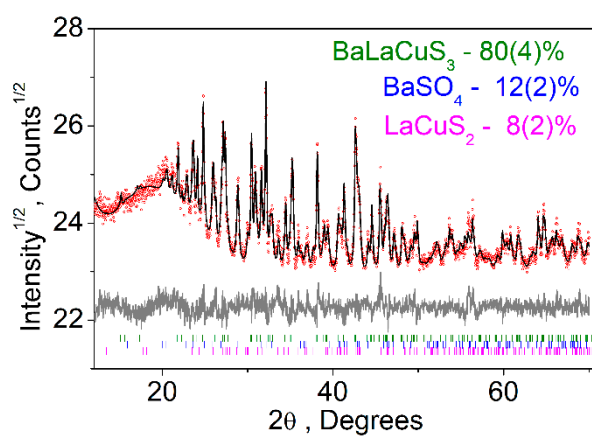

d)

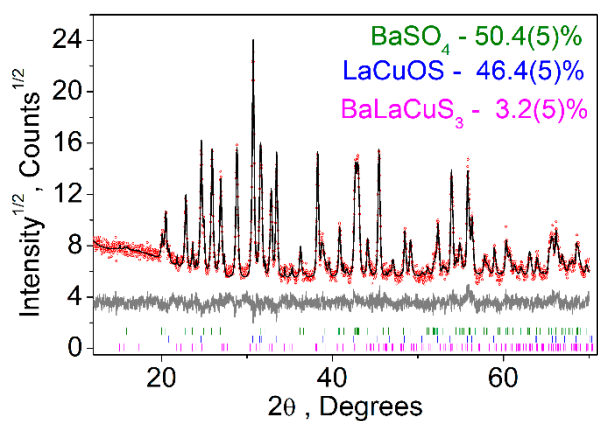

e)

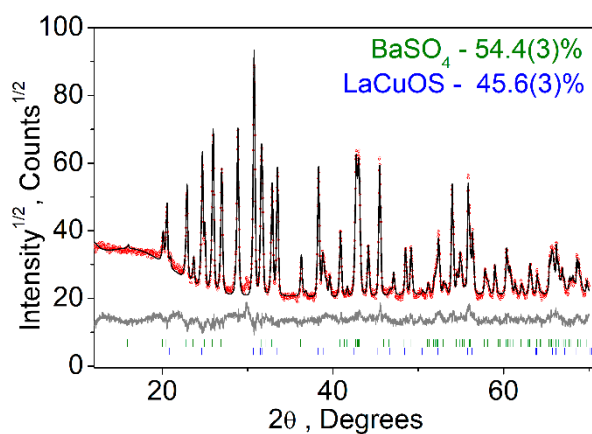

f)

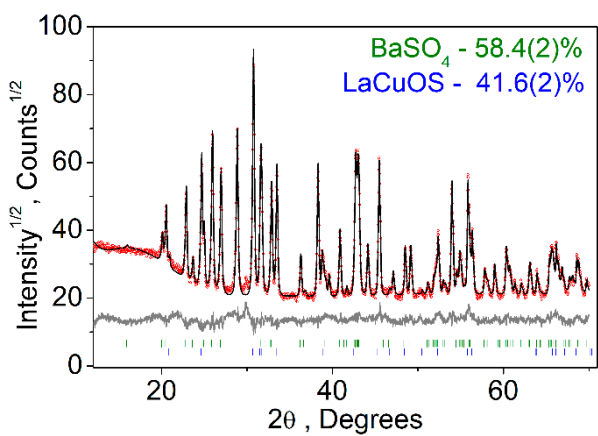

g)

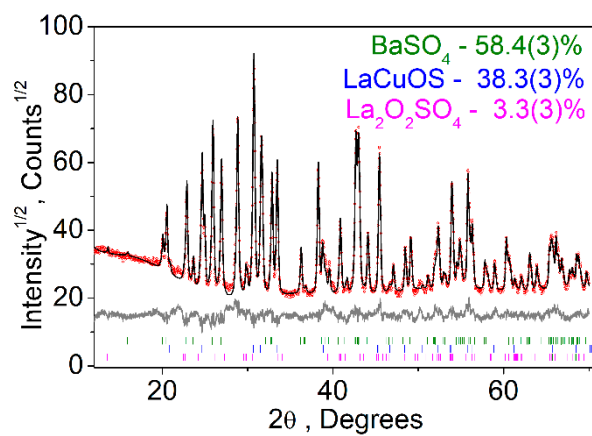

h)

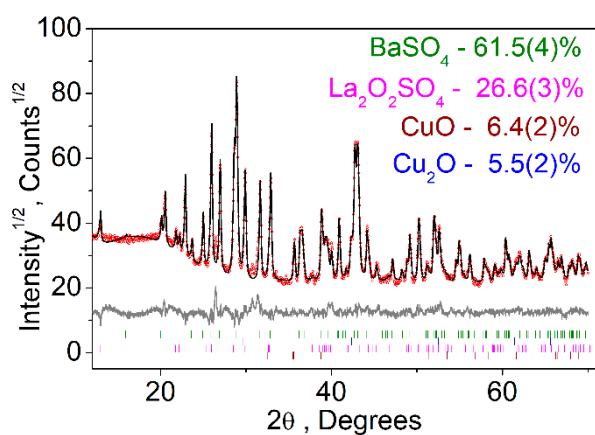

i)

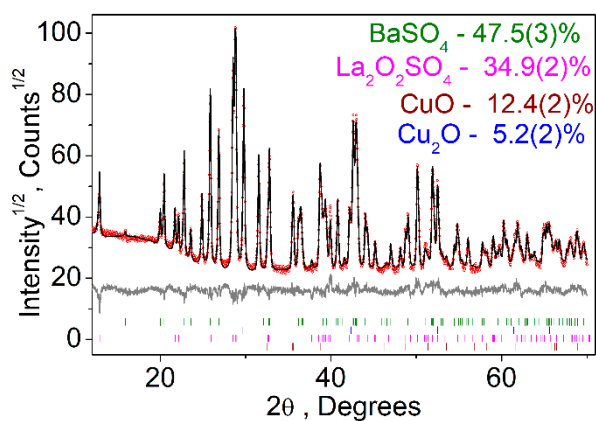

j)

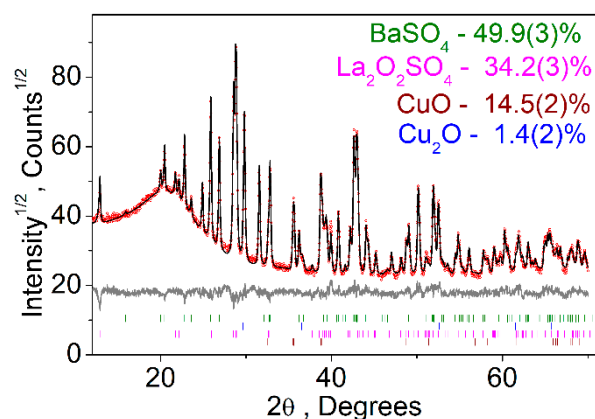

k)

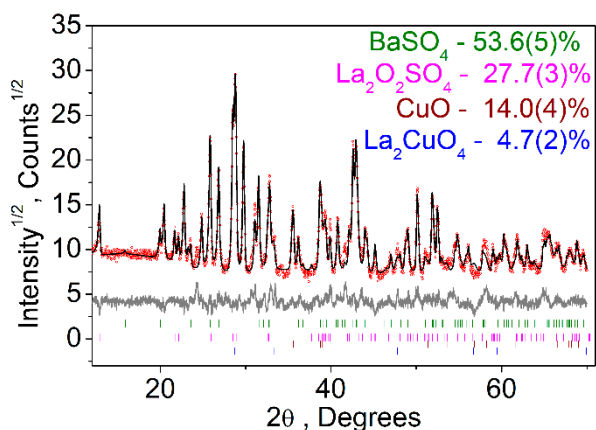

l)

**Figure S2.** Difference Rietveld plot of BaLaCuS<sub>3</sub> at temperature: a) T = 380 °C; b) T = 518 °C; c) T = 560 °C; d) T = 630 °C; e) T = 760 °C; f) T = 790 °C; g) T = 872 °C; h) T = 940 °C; i) T = 1020 °C; j) T = 1045 °C; k) T = 1137 °C; l) T = 1165 °C.

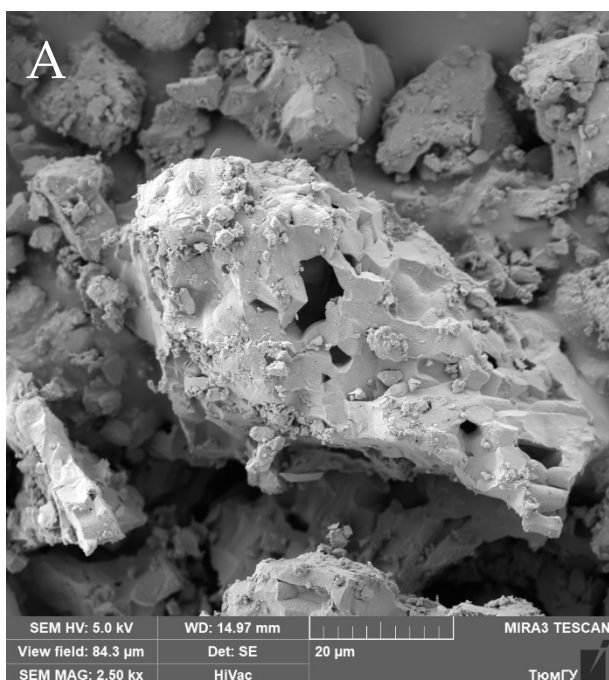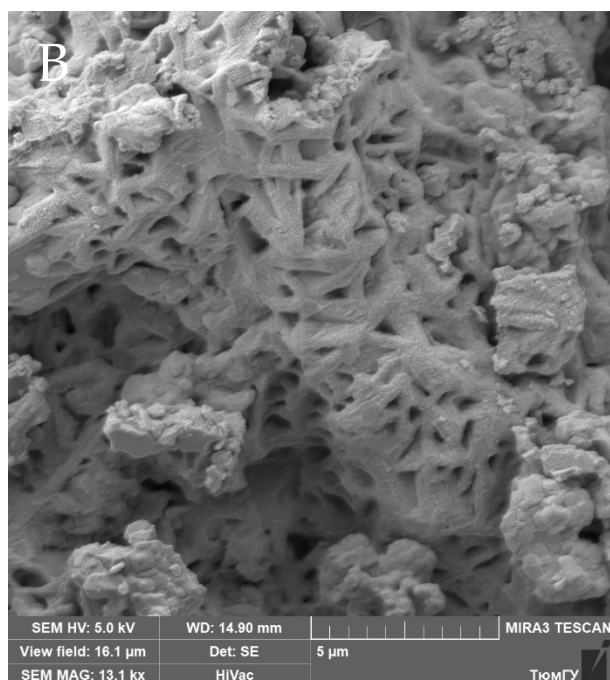



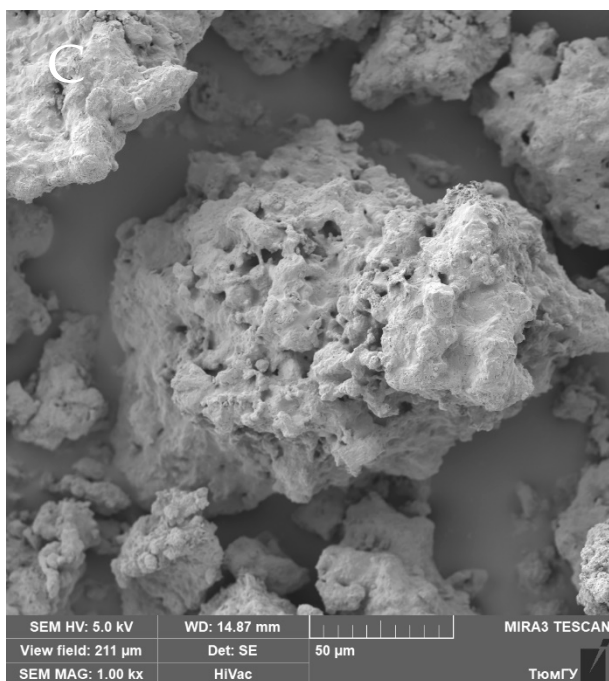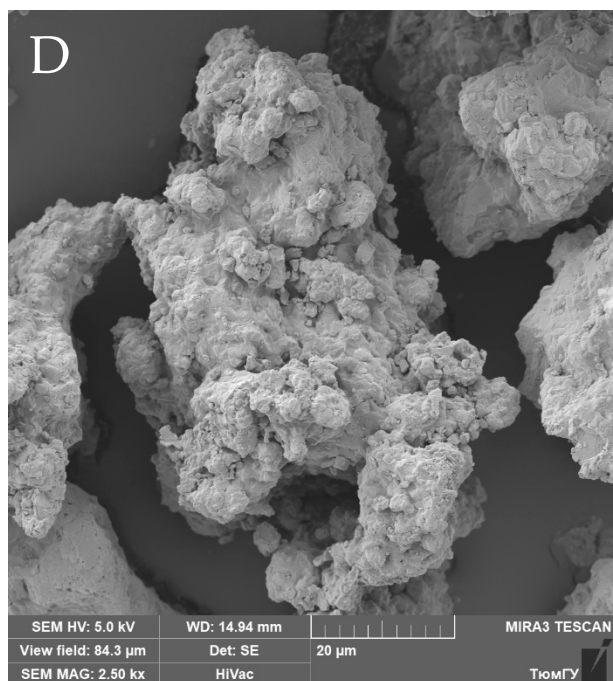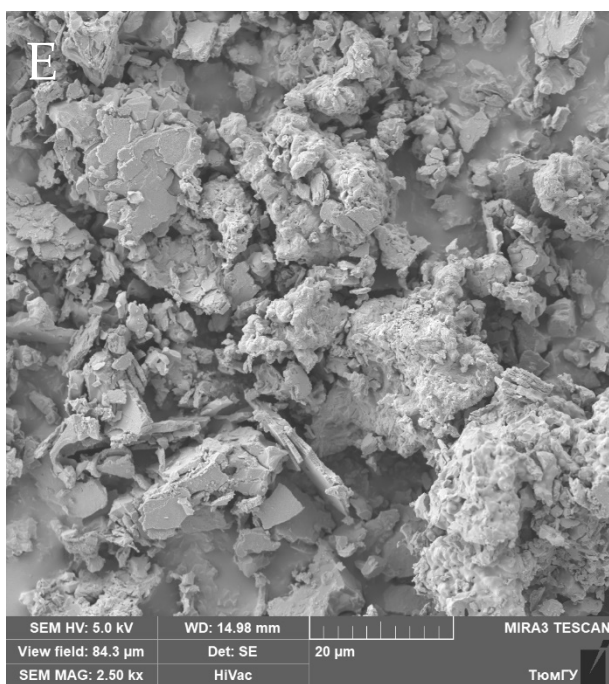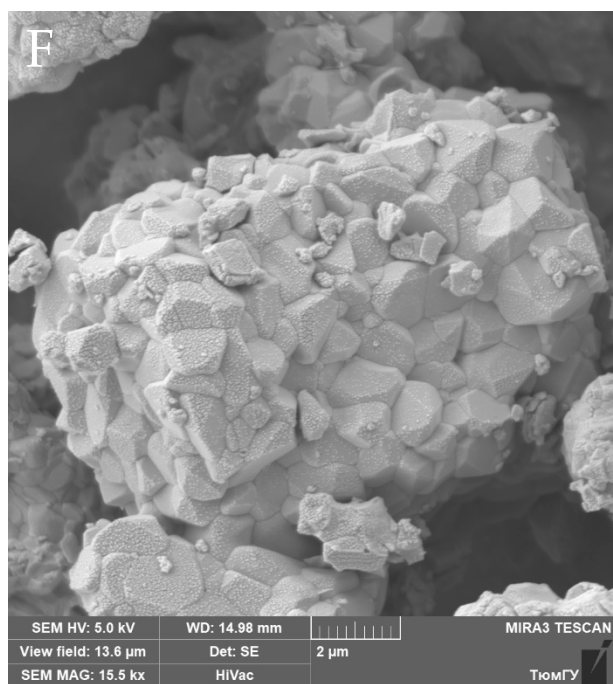

**Figure S3.** SEM patterns recorded for the intermediate products of the  $\text{BaLaCuS}_3$  oxidation. A – first state at 380°C, B – at 650 °C, C – at 900 °C, D – 1000 °C, E – 1100 °C, F – 1200 °C.

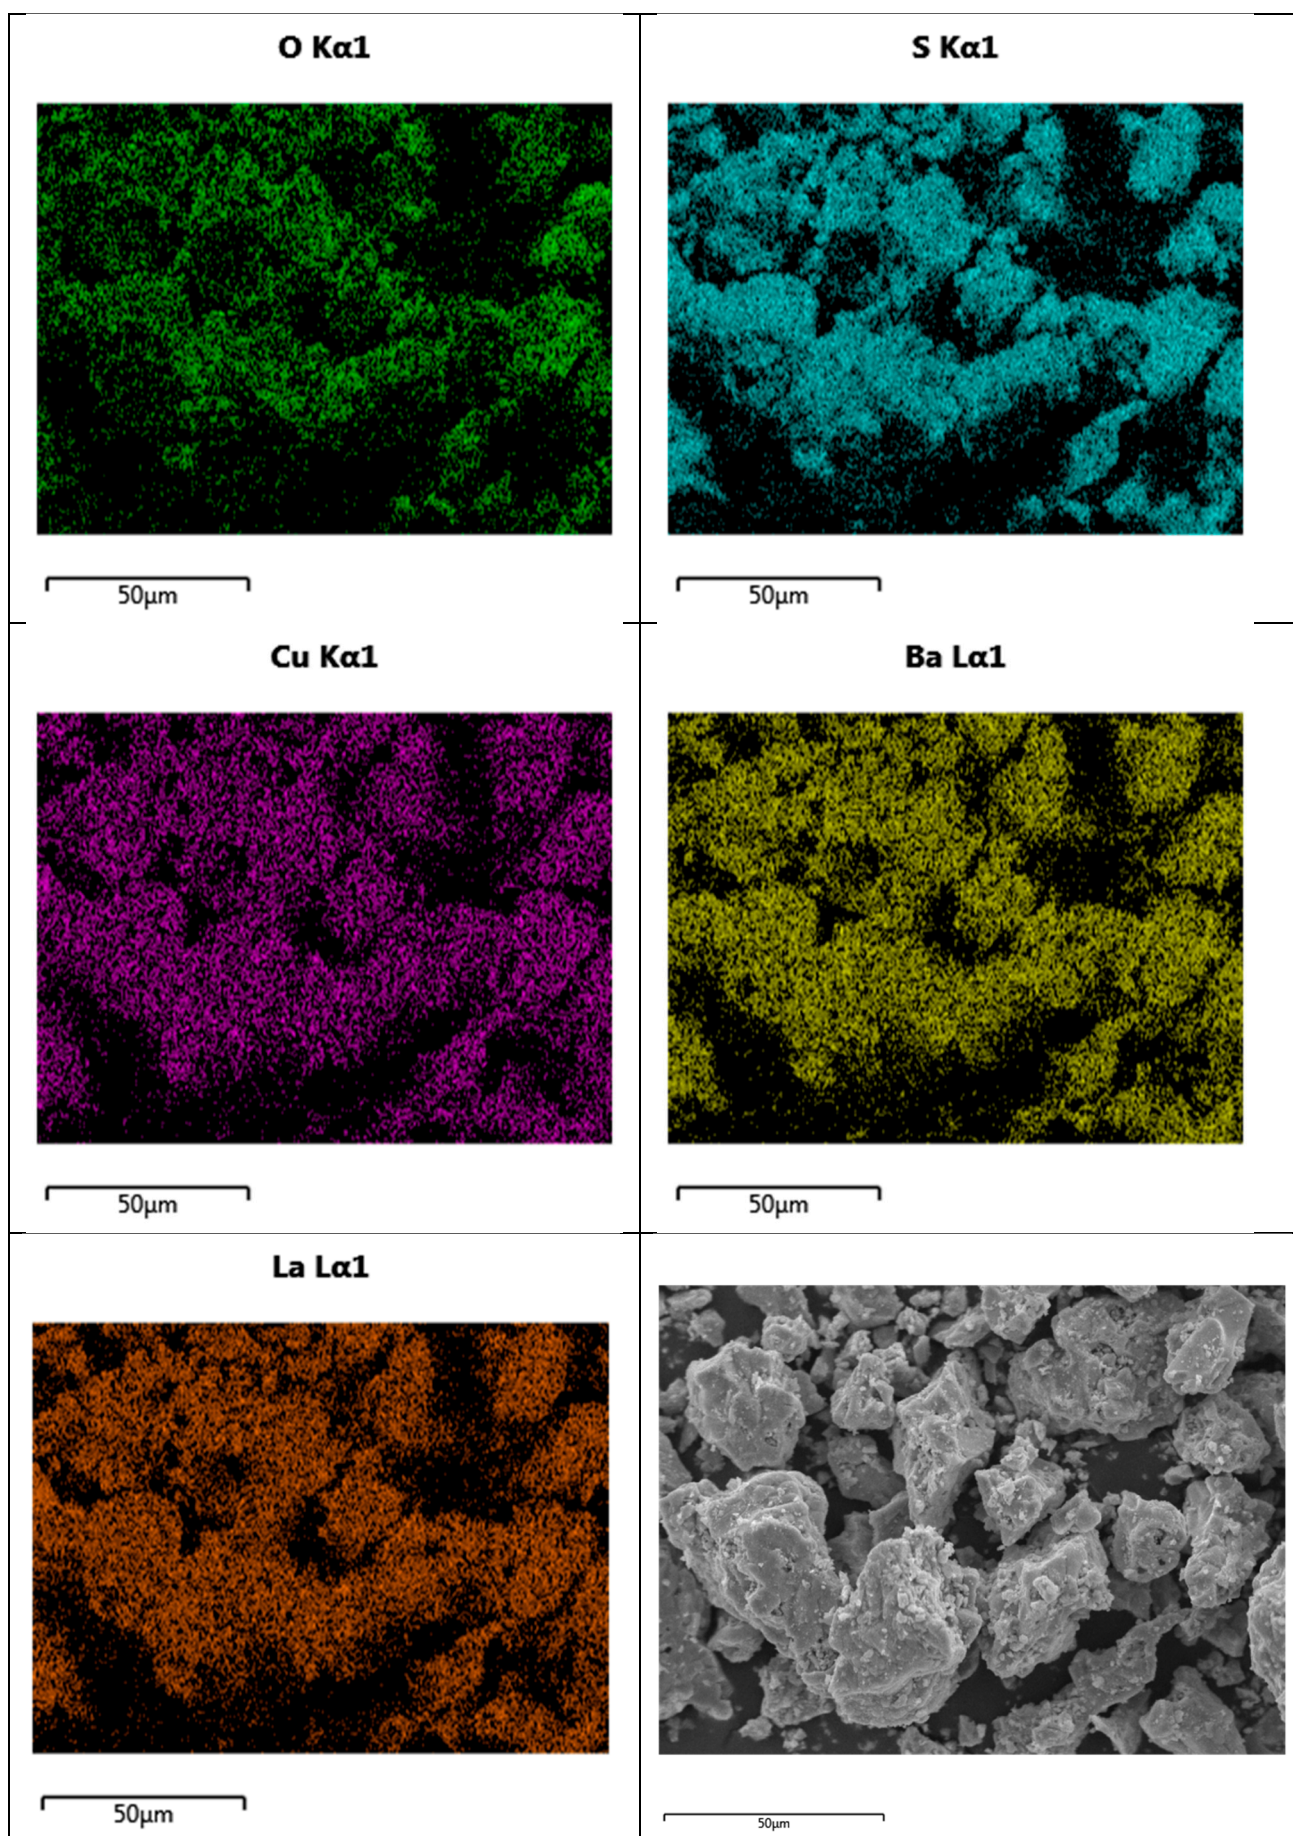

**Figure S4.** SEM and Energy dispersive X-ray (EDX) mapping analysis of BaLaCuS<sub>3</sub> oxidation at 380°C



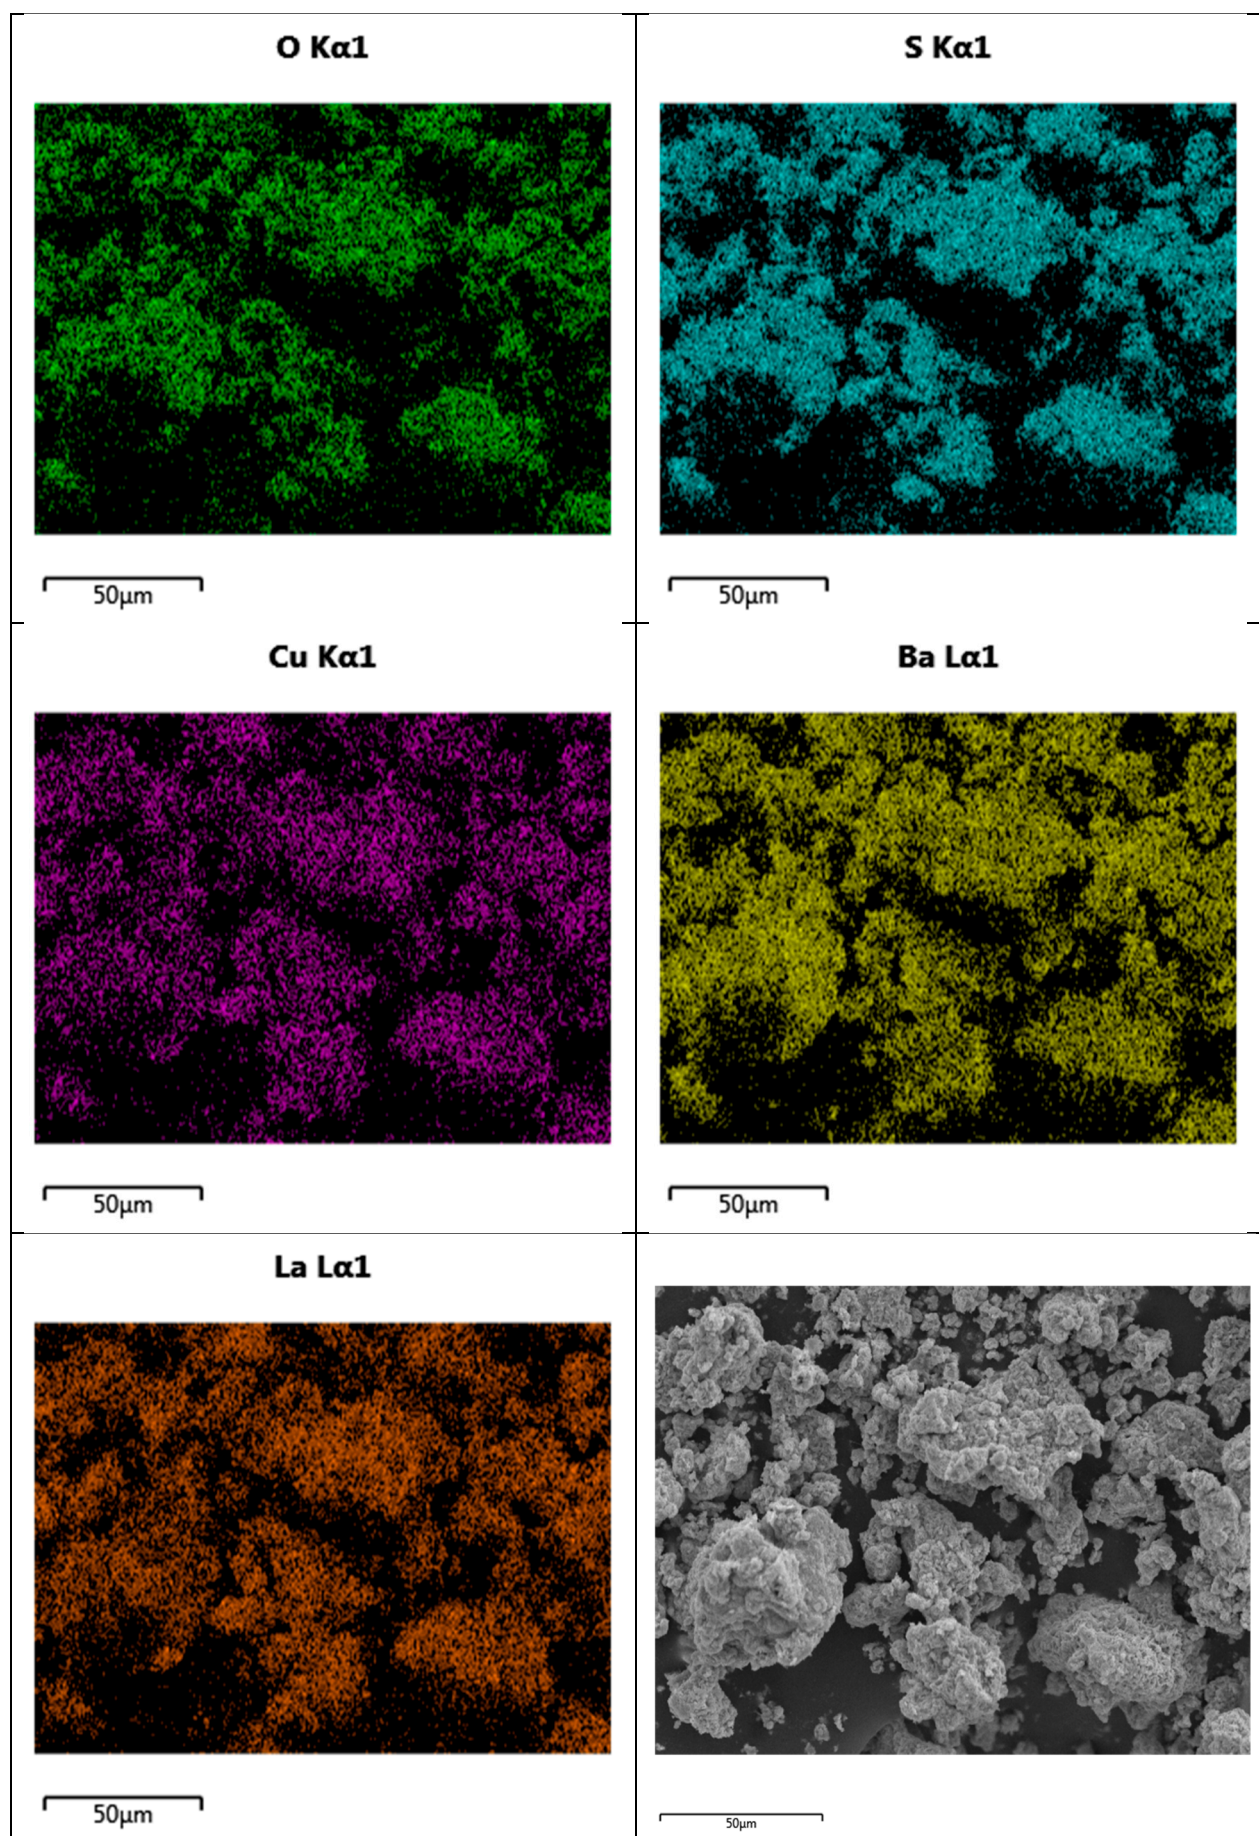

**Figure S5.** SEM and Energy dispersive X-ray (EDX) mapping analysis of  $\text{BaLaCuS}_3$  oxidation at  $650^\circ\text{C}$

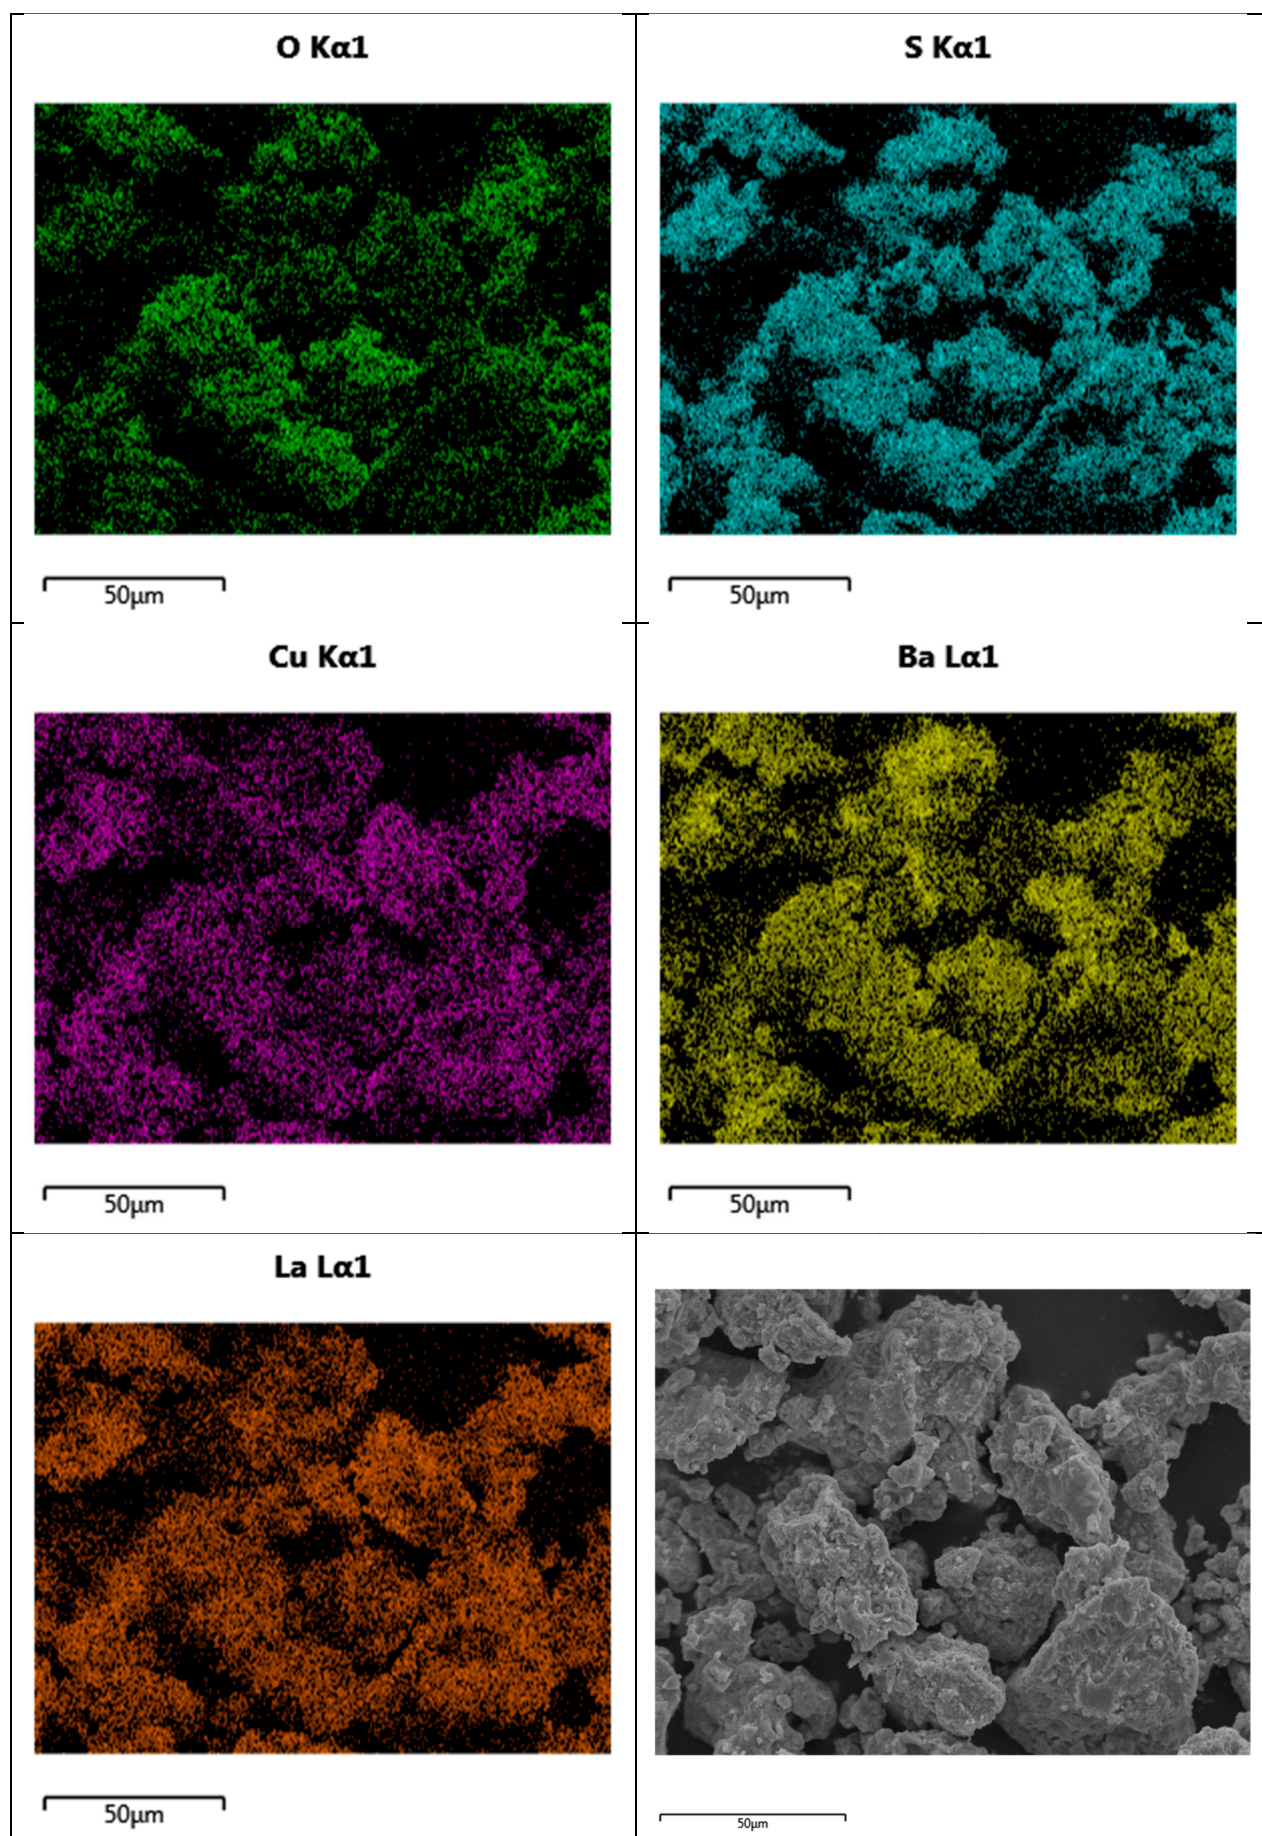

**Figure S6.** SEM and Energy dispersive X-ray (EDX) mapping analysis of BaLaCuS<sub>3</sub> oxidation at 900 °C



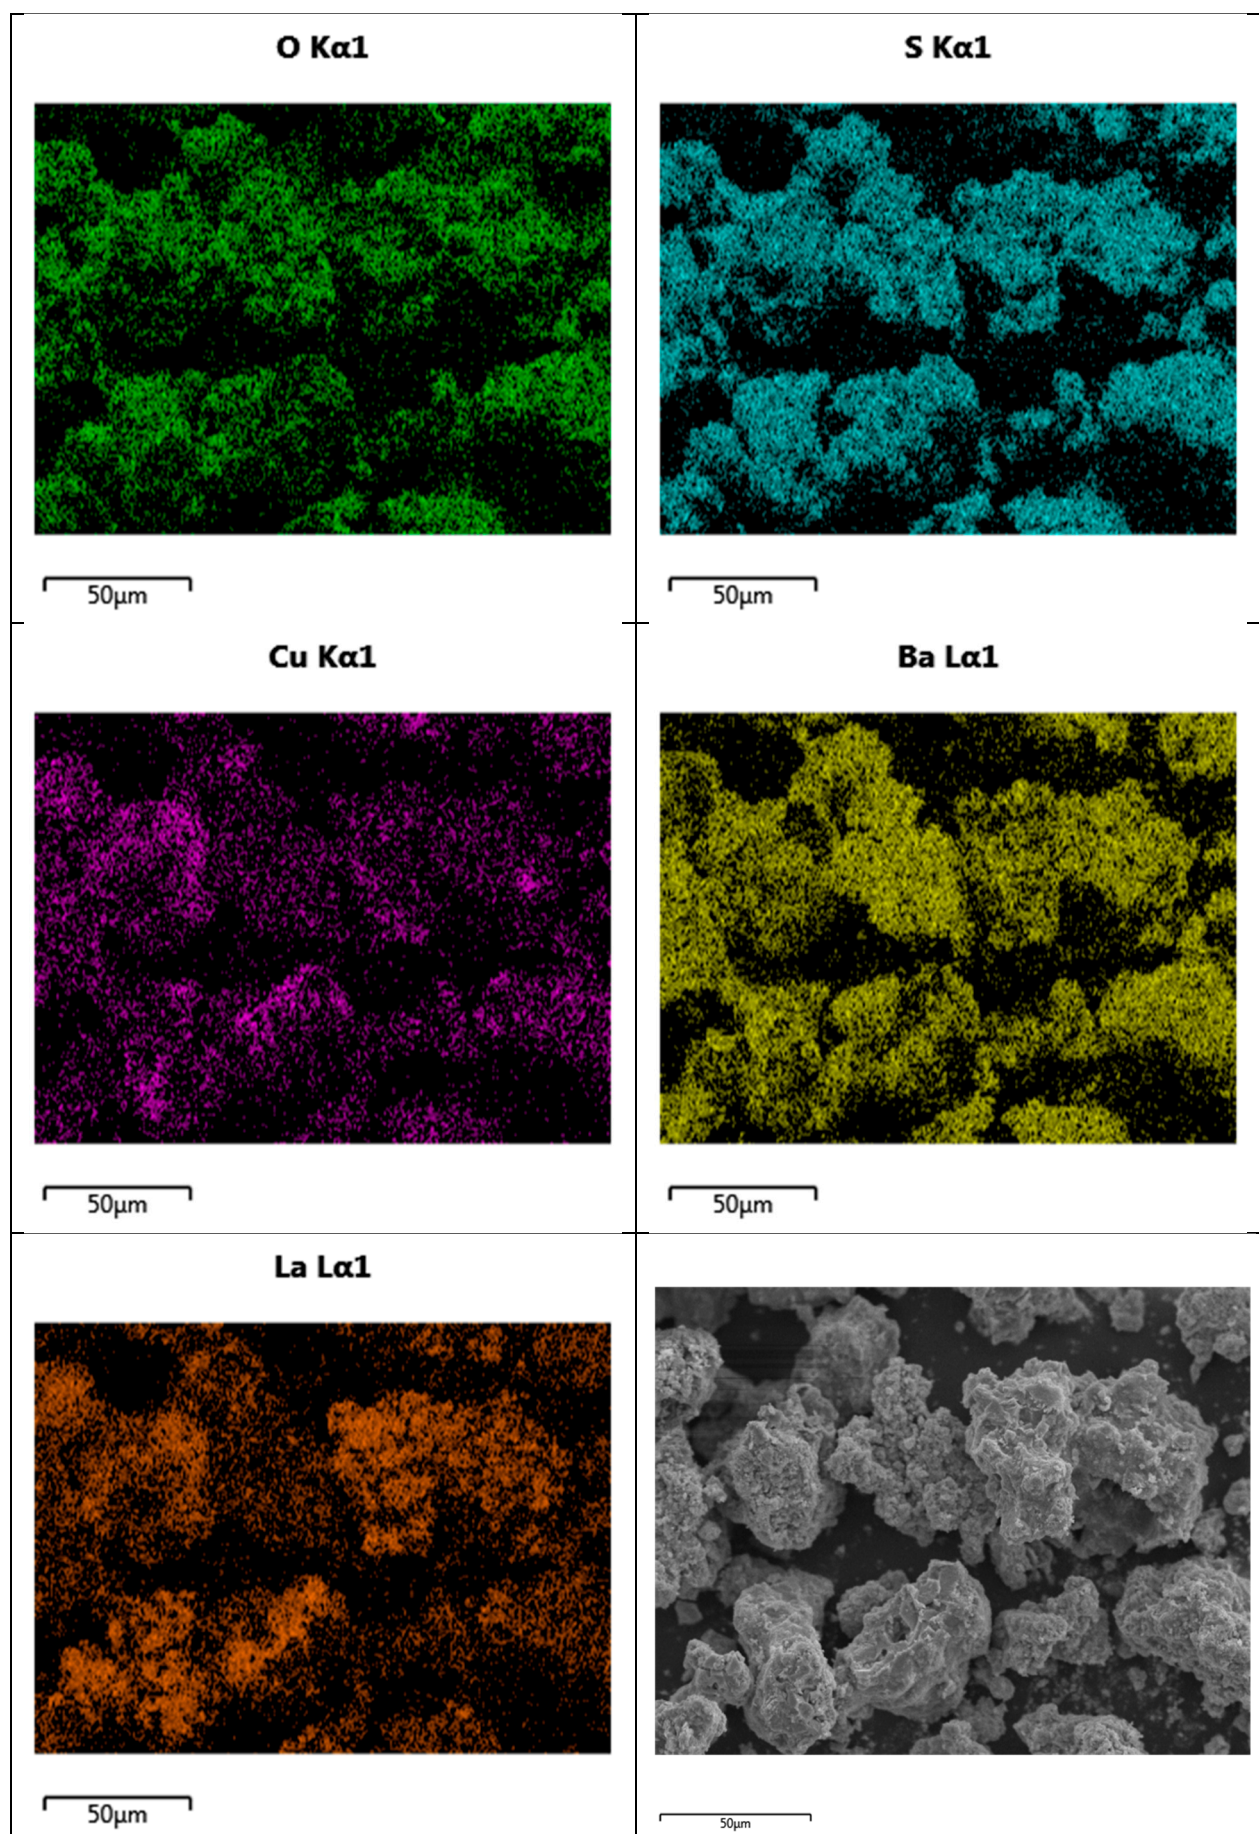

**Figure S7.** SEM and Energy dispersive X-ray (EDX) mapping analysis of BaLaCuS<sub>3</sub> oxidation at 1000 °C



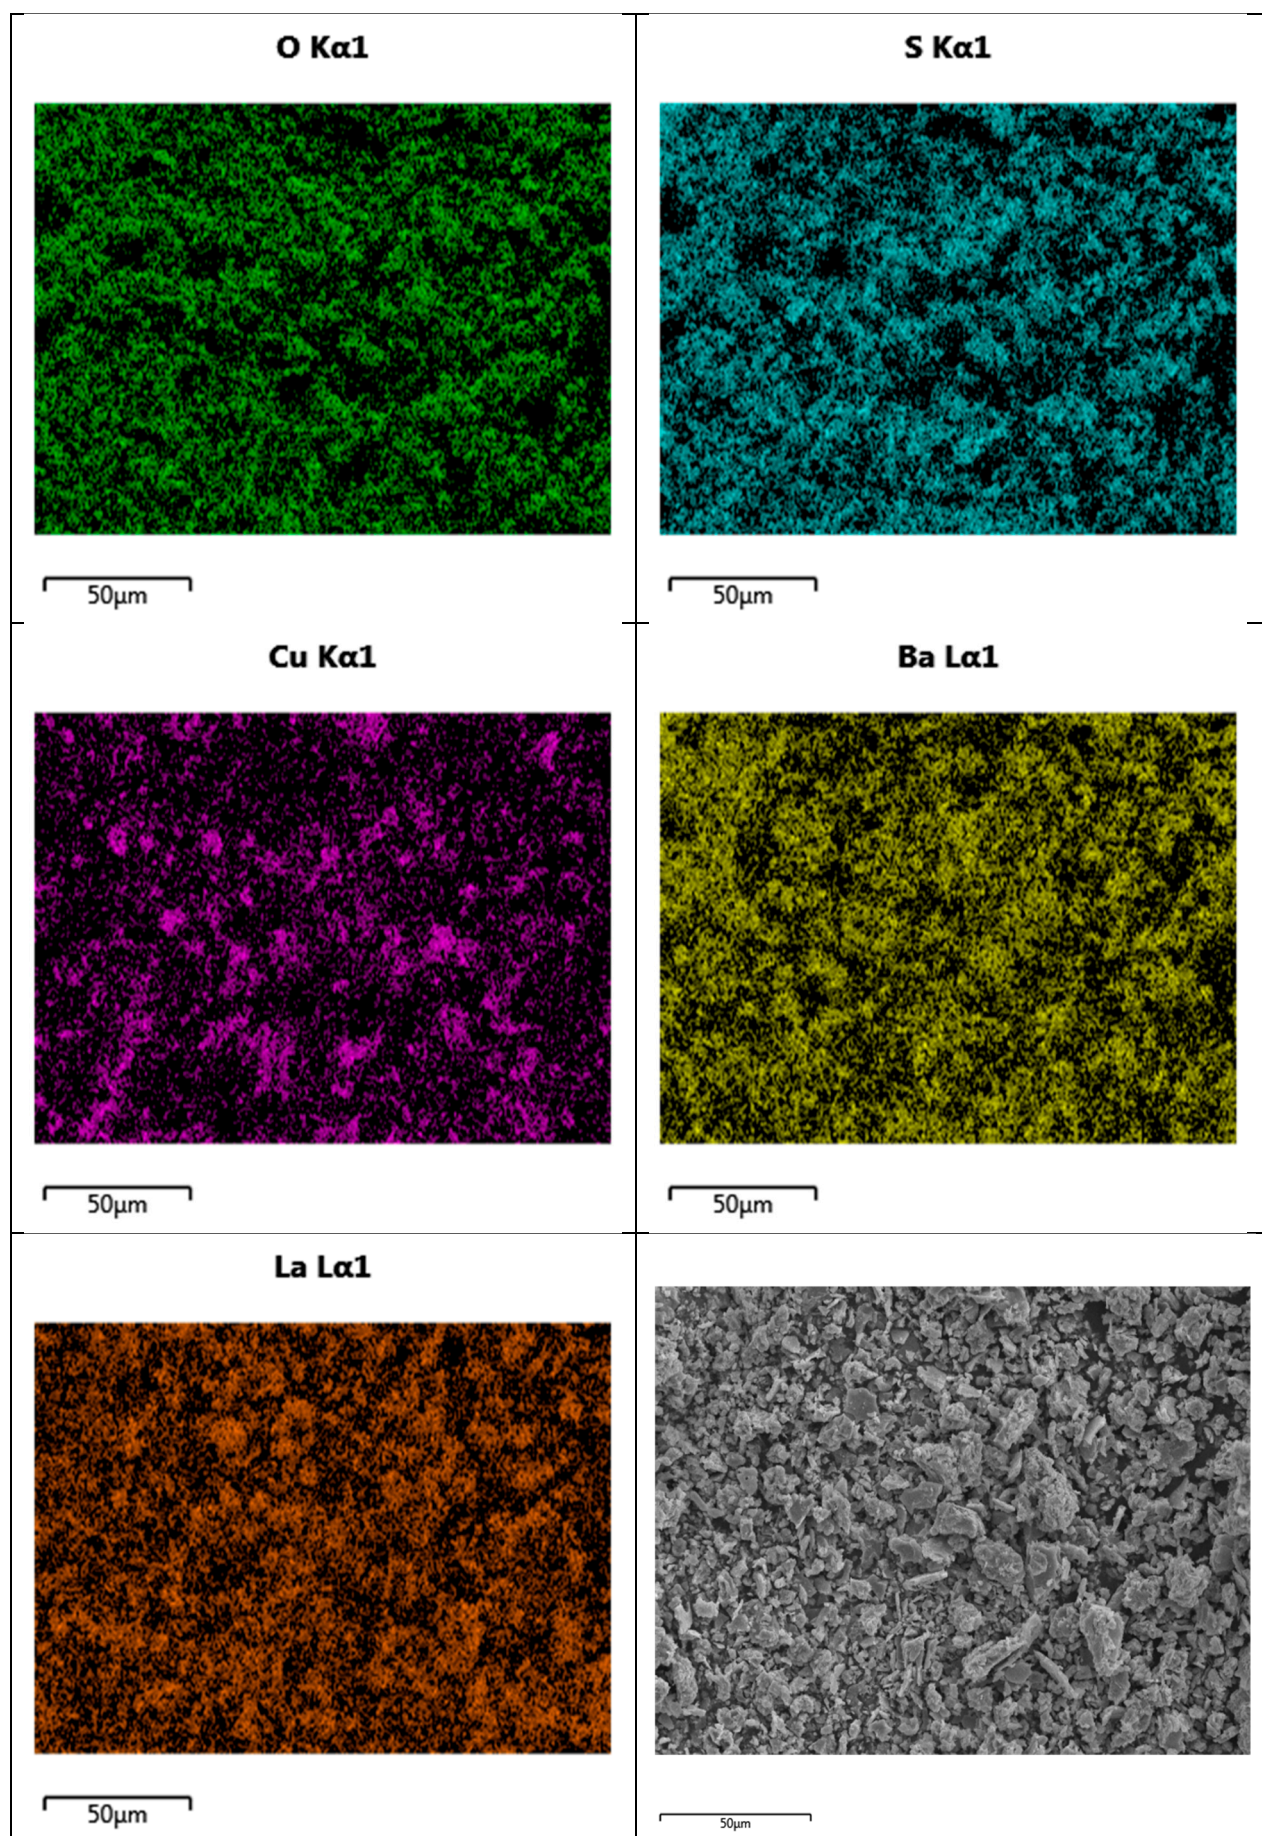

**Figure S8.** SEM and Energy dispersive X-ray (EDX) mapping analysis of  $\text{BaLaCuS}_3$  oxidation at  $1100\text{ }^\circ\text{C}$



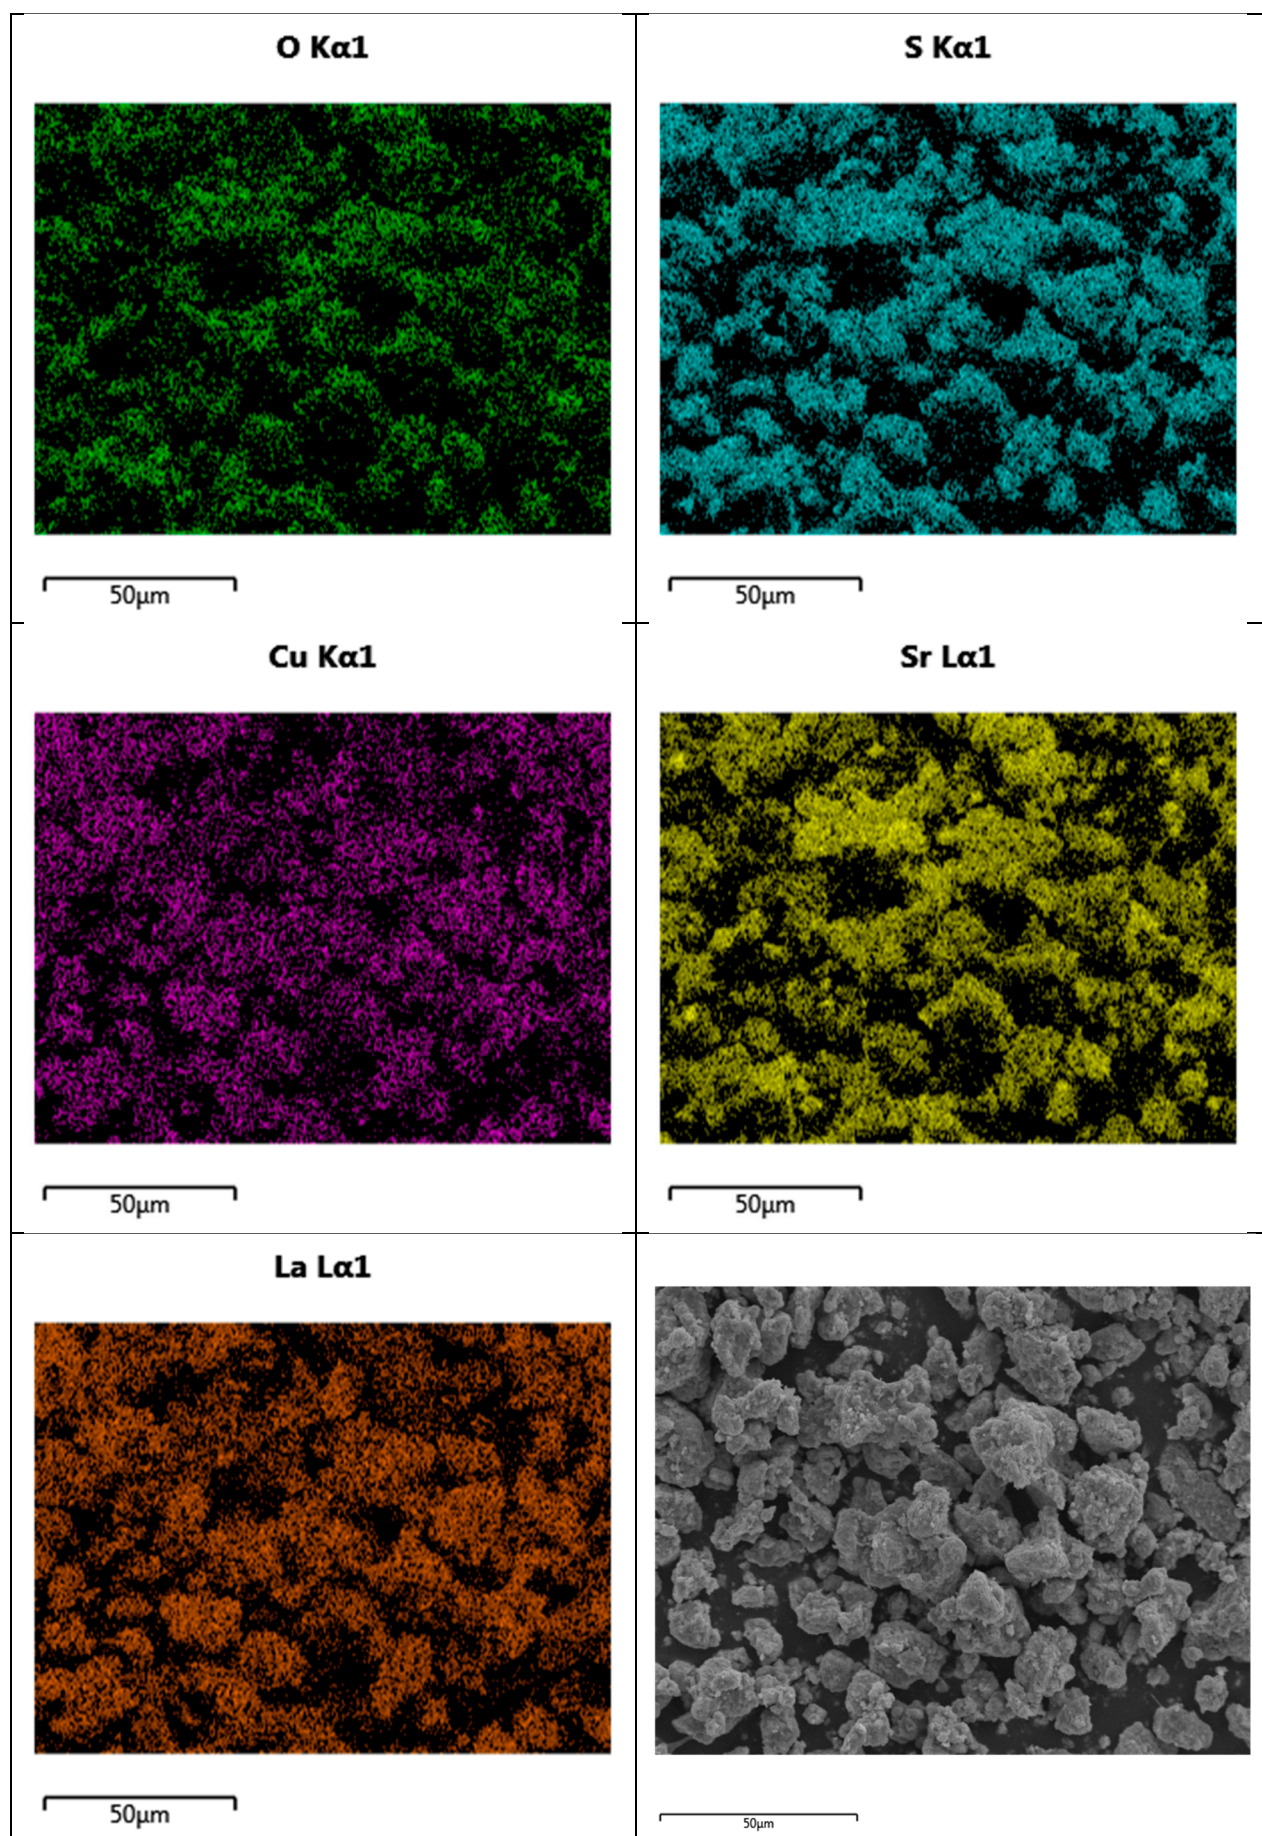

**Figure S9.** SEM and Energy dispersive X-ray (EDX) mapping analysis of BaLaCuS<sub>3</sub> oxidation at 1200 °C

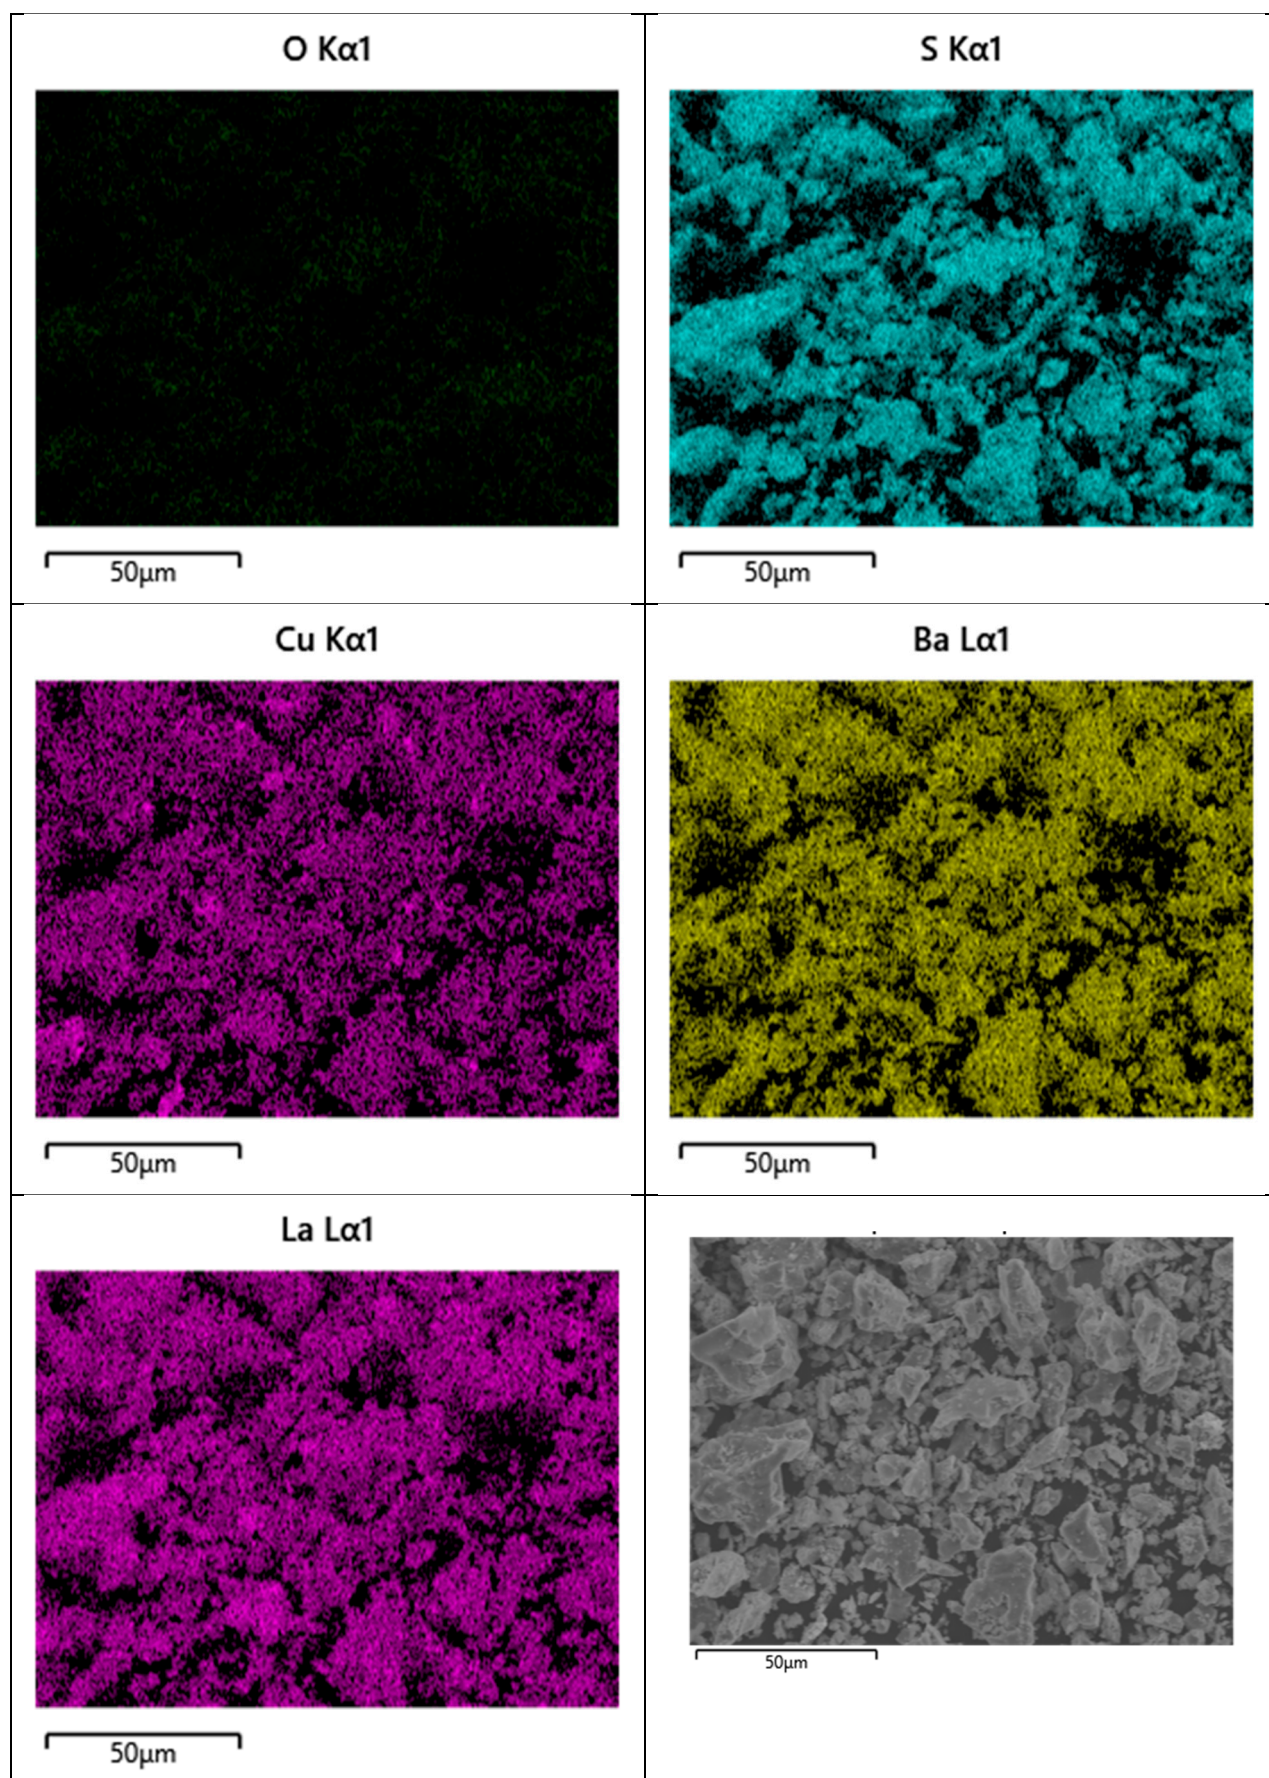

**Figure S10.** SEM and Energy dispersive X-ray (EDX) mapping analysis of BaLaCuS<sub>3</sub>



**Table S1.** Fractional atomic coordinates and isotropic displacement parameters ( $\text{\AA}^2$ ) of BaLaCuS<sub>3</sub>

| Atom | <i>x</i>    | <i>y</i> | <i>z</i>    | <i>B</i> <sub>iso</sub> | <i>Occ.</i> |
|------|-------------|----------|-------------|-------------------------|-------------|
| La   | -0.01065(4) | 0.25     | 0.81895(4)  | 0.201(19)               | 1           |
| Ba   | 0.31635(3)  | 0.25     | 0.00671(4)  | 0.201(19)               | 1           |
| Cu   | 0.24522(9)  | 0.25     | 0.29110(8)  | 0.96(3)                 | 1           |
| S1   | 0.04955(14) | 0.25     | 0.35169(14) | 0.40(4)                 | 1           |
| S2   | 0.22578(14) | 0.25     | 0.70312(14) | 0.56(5)                 | 1           |
| S3   | 0.38852(15) | 0.25     | 0.44404(14) | 0.30(4)                 | 1           |

**Table S2.** Main bond lengths ( $\text{\AA}$ ) of BaLaCuS<sub>3</sub>

|                     |             |                      |            |
|---------------------|-------------|----------------------|------------|
| La—S1 <sup>i</sup>  | 2.9530(11)  | La—S2                | 3.0076(16) |
| La—S2 <sup>ii</sup> | 3.0019(16)  | La—S3 <sup>iii</sup> | 2.9310(11) |
| La—S3 <sup>ii</sup> | 3.0078(17)  | Ba—S1 <sup>iv</sup>  | 3.1844(12) |
| Ba—S1 <sup>v</sup>  | 3.1247(16)  | Ba—S2 <sup>iv</sup>  | 3.1713(12) |
| Ba—S3 <sup>iv</sup> | 3.2342(13)  | Cu—S1                | 2.3314(18) |
| Cu—S2 <sup>iv</sup> | 2.38524(85) | Cu—S3                | 2.4220(19) |

Symmetry codes: (i) -x, y+1/2, -z+1; (ii) x+1/2, -y+1/2, -z+3/2; (iii) -x+1/2, -y, z+1/2; (iv) -x+1/2, -y, z+1/2; (v) x+1/2, -y+1/2, -z+1/2;

**Table S3.** Main parameters of processing and refinement of the BaLaCuS<sub>3</sub> samples after heating to specified temperature and cooling

| T, C | Phase                | Weight, % | R <sub>wp</sub> , R <sub>p</sub> (%) |
|------|----------------------|-----------|--------------------------------------|
| 380  | BaLaCuS <sub>3</sub> | 100       | 0.52, 0.40                           |
| 518  | BaLaCuS <sub>3</sub> | 98.5(3)   | 0.65, 0.49                           |
|      | BaSO <sub>4</sub>    | 1.5(3)    |                                      |
| 560  | BaLaCuS <sub>3</sub> | 98.2(4)   | 0.98, 0.76                           |
|      | BaSO <sub>4</sub>    | 1.8(4)    |                                      |
| 630  | BaLaCuS <sub>3</sub> | 80(4)     | 1.18, 0.91                           |

|      |                                                |         |             |
|------|------------------------------------------------|---------|-------------|
|      | BaSO <sub>4</sub>                              | 12(2)   |             |
|      | LaCuS <sub>2</sub>                             | 8(2)    |             |
|      | BaLaCuS <sub>3</sub>                           | 50.4(5) |             |
| 760  | BaSO <sub>4</sub>                              | 46.4(5) | 9.17, 7.24  |
|      | BaLaCuS <sub>3</sub>                           | 3.2(5)  |             |
| 790  | BaSO <sub>4</sub>                              | 54.4(3) | 8.36, 6.60  |
|      | LaCuOS                                         | 45.6(3) |             |
| 872  | BaSO <sub>4</sub>                              | 58.4(2) | 7.06, 5.47  |
|      | LaCuOS                                         | 41.6(2) |             |
|      | BaSO <sub>4</sub>                              | 58.4(3) |             |
| 940  | LaCuOS                                         | 38.3(3) | 7.45, 5.77  |
|      | La <sub>2</sub> O <sub>2</sub> SO <sub>4</sub> | 3.3(3)  |             |
|      | BaSO <sub>4</sub>                              | 61.5(4) |             |
| 1020 | La <sub>2</sub> O <sub>2</sub> SO <sub>4</sub> | 26.6(3) | 6.98, 5.16  |
|      | CuO                                            | 6.4(2)  |             |
|      | Cu <sub>2</sub> O                              | 5.5(2)  |             |
|      | BaSO <sub>4</sub>                              | 47.5(3) |             |
| 1045 | La <sub>2</sub> O <sub>2</sub> SO <sub>4</sub> | 34.9(2) | 6.80, 5.27  |
|      | CuO                                            | 12.4(2) |             |
|      | Cu <sub>2</sub> O                              | 5.2(2)  |             |
|      | BaSO <sub>4</sub>                              | 49.9(3) |             |
| 1137 | La <sub>2</sub> O <sub>2</sub> SO <sub>4</sub> | 34.2(3) | 5.33, 4.05  |
|      | CuO                                            | 14.5(2) |             |
|      | Cu <sub>2</sub> O                              | 1.4(2)  |             |
|      | BaSO <sub>4</sub>                              | 53.6(5) |             |
| 1165 | La <sub>2</sub> O <sub>2</sub> SO <sub>4</sub> | 27.7(3) | 10.48, 7.84 |
|      | CuO                                            | 14.0(4) |             |
|      | La <sub>2</sub> CuO <sub>4</sub>               | 4.7(2)  |             |

---
